# Supplementary material
Source: PubMed Central journal article supplement (PMC4767972)
Supplement: JCM.01818-15_zjm999094806so9.pdf [file JCM.01818-15_zjm999094806so9.pdf]

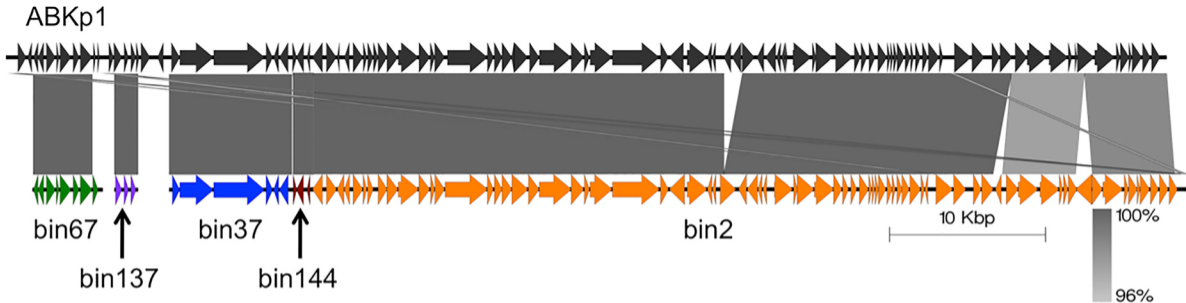

**Figure S8. Comparison of AGEs that differed between ABOB isolates with *A. baumannii* plasmid ABKp1.**

Nucleotide sequences of AGEs found in some, but not all, ABOB outbreak isolates were aligned to the nucleotide sequence of *A. baumannii* plasmid ABKp1. Arrows represent annotated coding sequences. Gray blocks indicate highly similar sequences, as indicated by the legend. Individual ABOB AGEs are differentiated by color, and labels correspond to the AGE labels shown in Fig 6.
